# Supplementary material for: Positive Correlation of Lodging Resistance and Soybean Yield under the Influence of Uniconazole
Source: MDPI journal article supplement (doi:10.3390/agronomy14040754), 2024-04-05
Supplement: s1 [file s1]

Archive with 3 entries (3 files):
- Figure S1.tif
- Table S1.pdf
- Table S2.pdf
