# Supplementary material for: Positive Correlation of Lodging Resistance and Soybean Yield under the Influence of Uniconazole
Source: MDPI journal article supplement (doi:10.3390/agronomy14040754), 2024-04-05
Supplement: s1 [file s1]

Table S2. Correlation coefficient between soybean lodging resistance coefficient and yield

|       | HN84                                                  |                                                            | HN60                                                  |                                                            |
|-------|-------------------------------------------------------|------------------------------------------------------------|-------------------------------------------------------|------------------------------------------------------------|
|       | Lodging resistance<br>coefficient at<br>podding stage | Lodging resistance<br>coefficient at seed<br>filling stage | Lodging resistance<br>coefficient at<br>podding stage | Lodging resistance<br>coefficient at seed<br>filling stage |
| yield | 0.56**                                                | 0.44*                                                      | 0.39*                                                 | -0.29                                                      |

Note: \* and \*\* are  $P \leq 0.05$  and  $P \leq 0.01$ , respectively.
