# Supplementary material for: Positive Correlation of Lodging Resistance and Soybean Yield under the Influence of Uniconazole
Source: MDPI journal article supplement (doi:10.3390/agronomy14040754), 2024-04-05
Supplement: s1 [file s1]

Table S1. The soybean fresh weight (g)

| cultiver | treatment | Period(P)      |                     |
|----------|-----------|----------------|---------------------|
|          |           | podding period | seed filling period |
| HN48     | D20       | control        | 169.31±5.71ab       |
|          |           | S3307          | 176.21±6.01a        |
|          | D30       | control        | 155.81±2.64b        |
|          |           | S3307          | 164.91±7.16ab       |
|          | D40       | control        | 138.98±1.26c        |
|          |           | S3307          | 140.47±4.38c        |
| HN60     | D30       | control        | 100.08±6.58a        |
|          |           | S3307          | 109.64±8.81a        |
|          | D40       | control        | 77.9±2.49b          |
|          |           | S3307          | 85.09±1.97b         |
|          | D50       | control        | 71.32±2.52b         |
|          |           | S3307          | 79.58±3.97b         |

Note: The values in the table are the means  $\pm$  standard error (n = 5), different letters indicate that the difference between treatments reached significance at the level of  $p < 0.05$ , and the treatments are compared longitudinally.
