# Supplementary figures and images for: Positive Correlation of Lodging Resistance and Soybean Yield under the Influence of Uniconazole
Source: MDPI journal article supplement (doi:10.3390/agronomy14040754), 2024-04-05

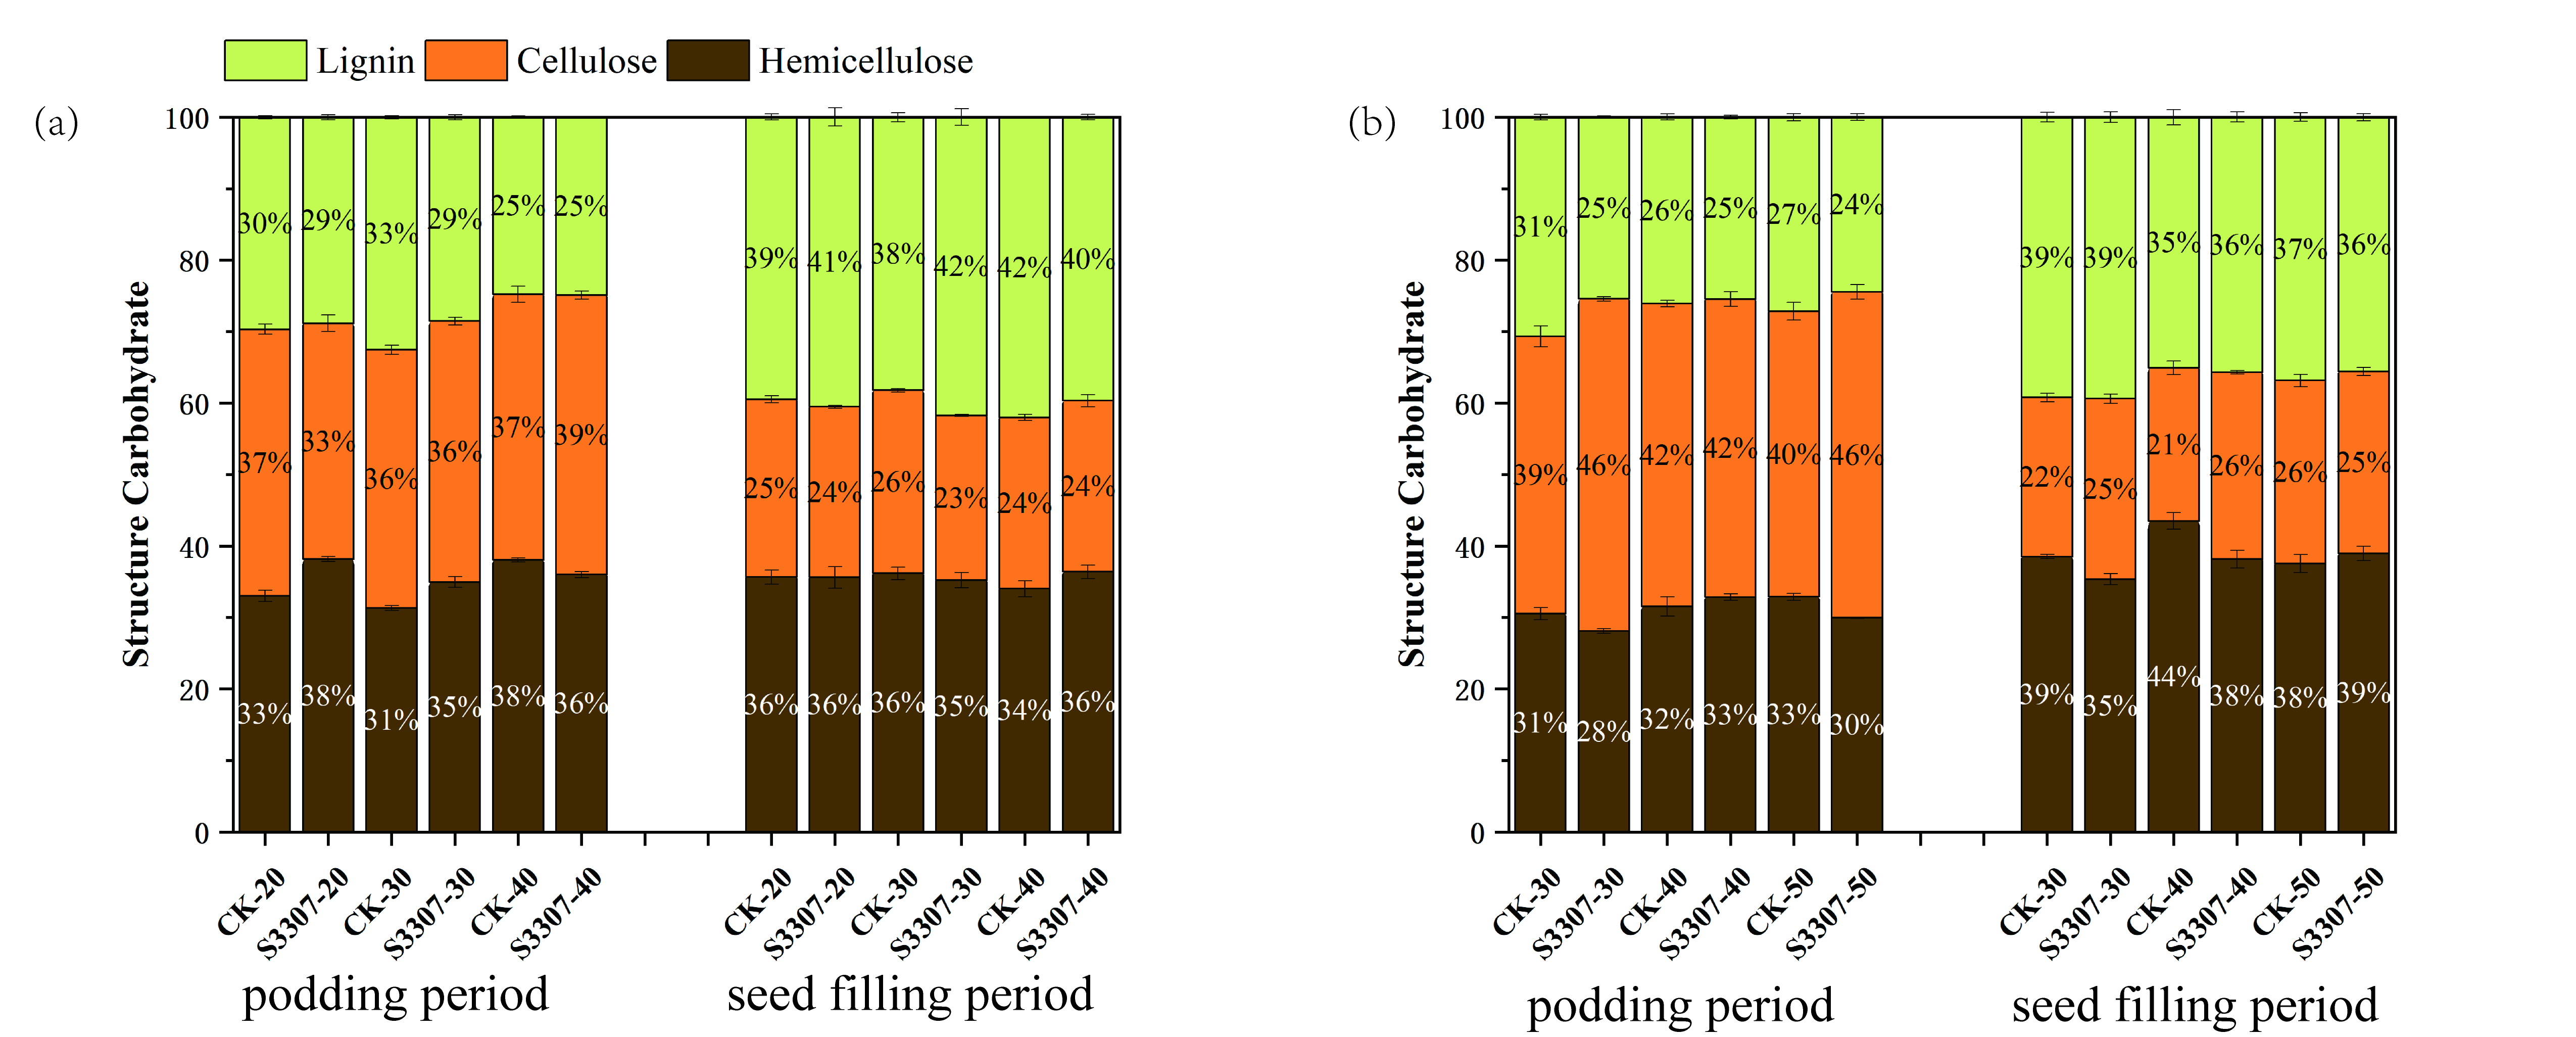

Supplement: s1 [file s1 › Figure S1.tif]
